# Supplementary material
Source: PubMed Central journal article supplement (PMC3137048)
Supplement: supp_M110.175364_jbc.M110.175364-1.pdf [file supp_M110.175364_jbc.M110.175364-1.pdf]

**A**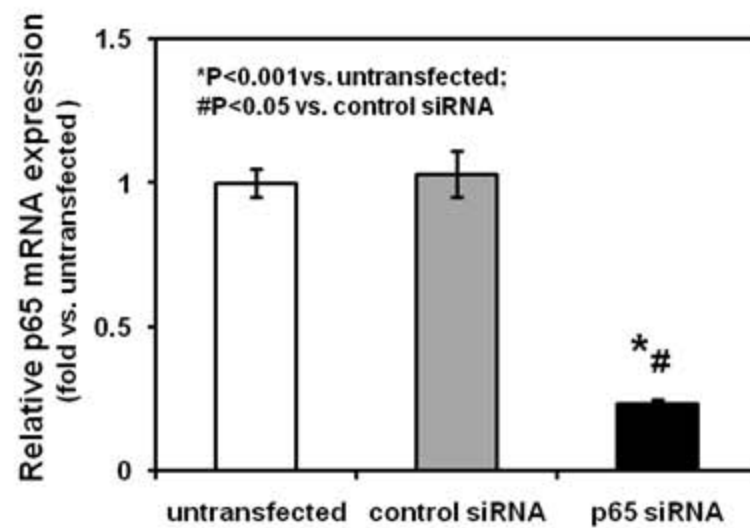**B**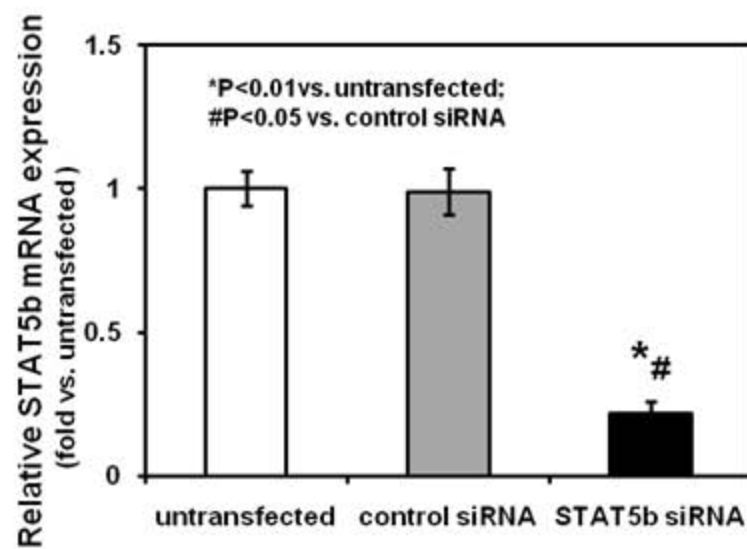

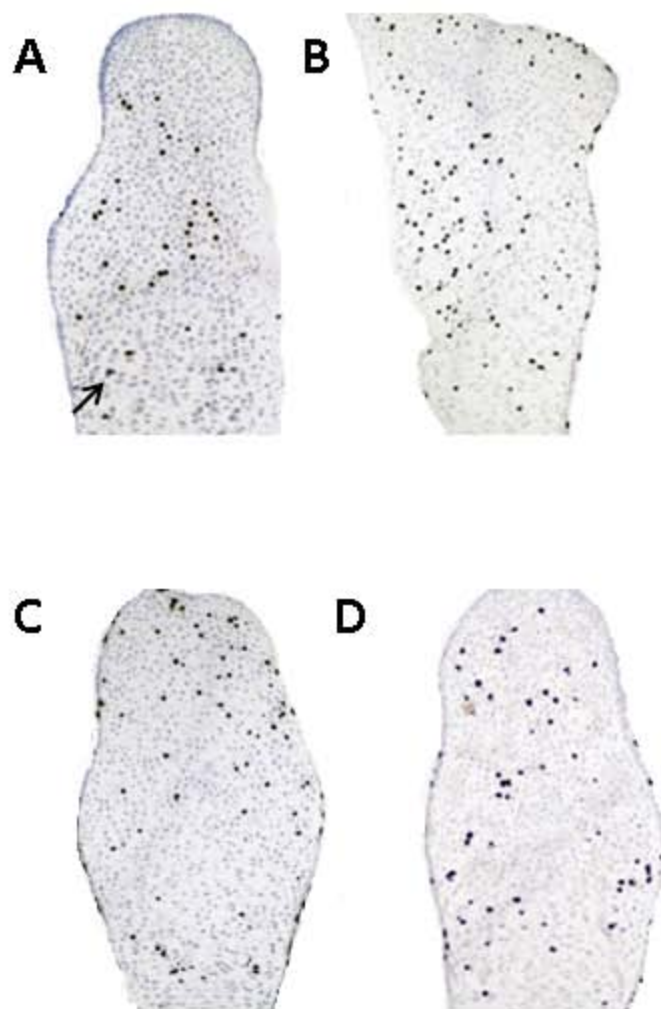

**SUPPLEMENTAL FIGURE 2**

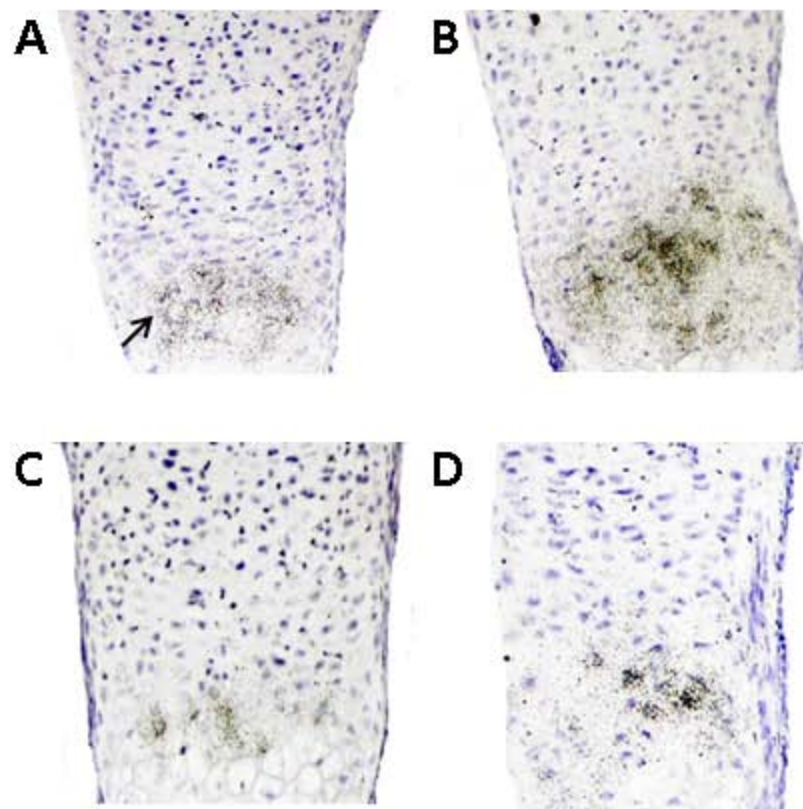

**SUPPLEMENTAL FIGURE 3**

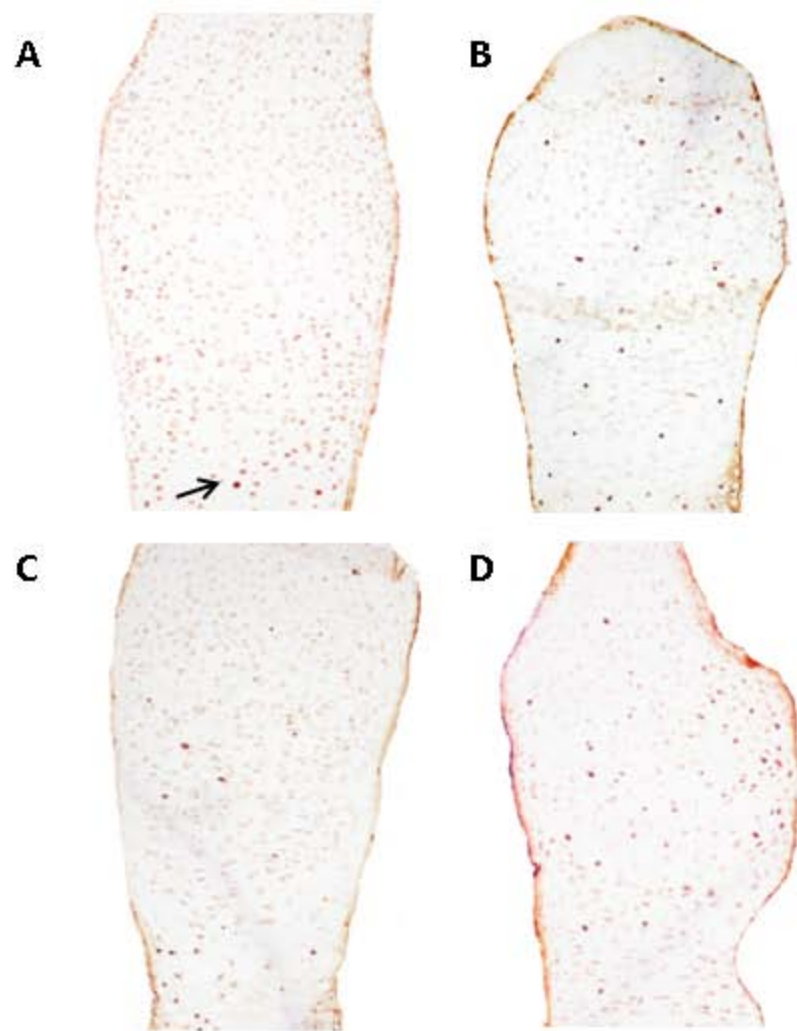

**SUPPLEMENTAL FIGURE 4**

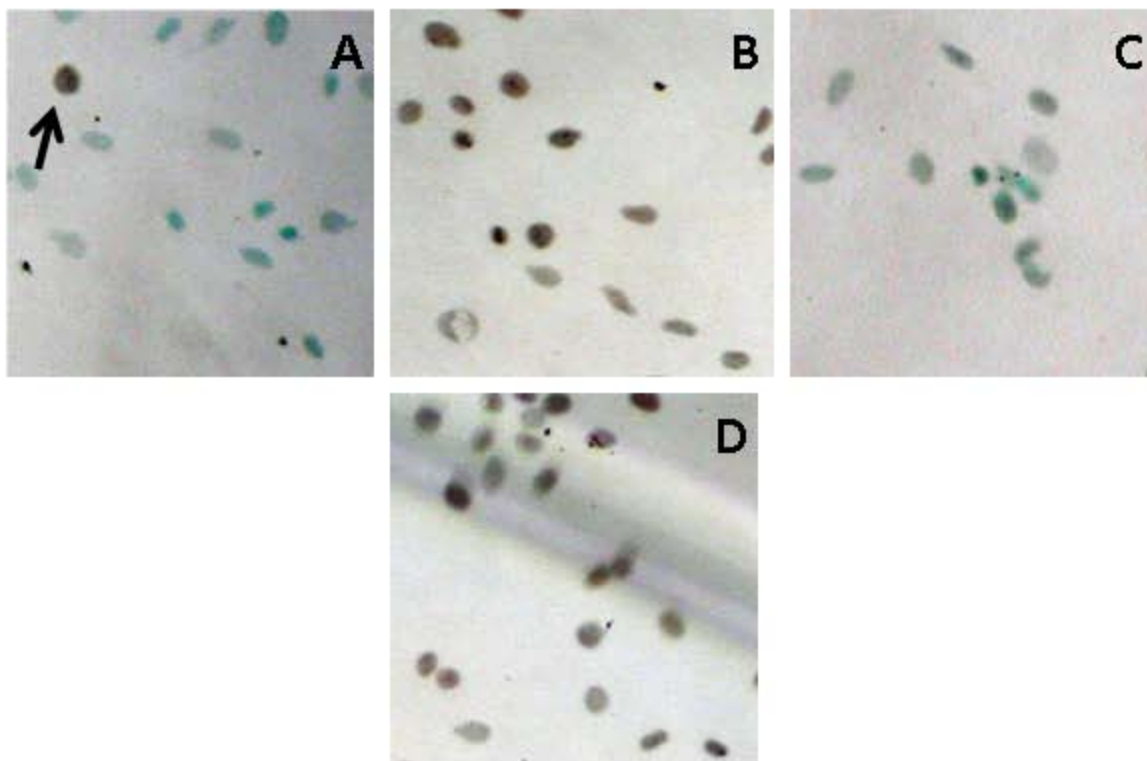

**SUPPLEMENTAL FIGURE 5**

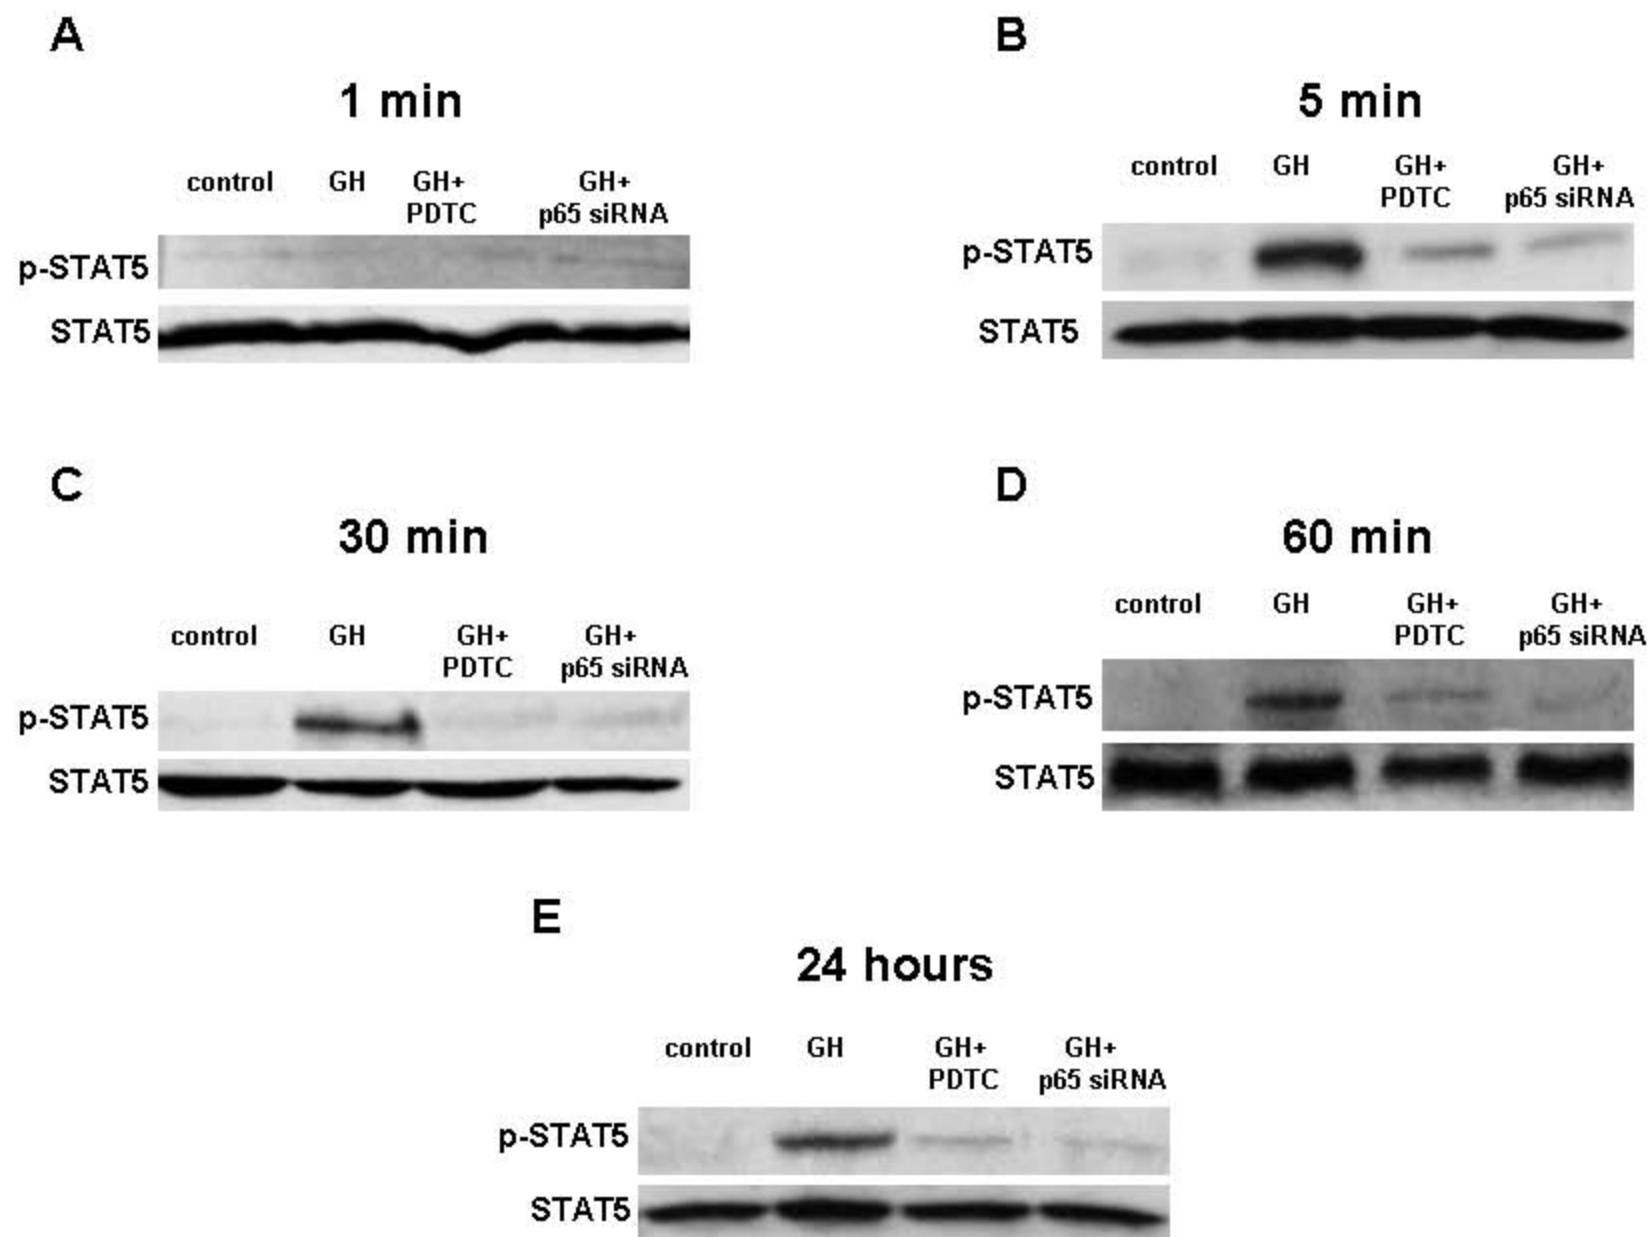

SUPPLEMENTAL FIGURE 6
